## CONFLICT OF INTEREST STATEMENT

None declared.

(See related article by Otteman and Ishani. Comparing US and Chinese dialysis patients: an editorial on Cheng *et al.* Mortality rates among prevalent hemodialysis patients in Beijing: a comparison with USRDS data. *Nephrol Dial Transplant* 2013; 28: 495–497.)

## REFERENCES

1. Dialysis and Transplant Registration Group of Chinese Society of Nephrology. National registration of dialysis and transplantation. *Zhonghua Shenzangbing Zazhi* 2001; 17: 77–78
2. Zuo L, Wang M. Current burden and probable increasing incidence of ESRD in China. *Clin Nephrol* 2010; 74(S1): 20–22
3. Zuo L, Wang M. Current status and problem of hemodialysis in Beijing. *Zhongguo Xueye Jinghua* 2007; 6: 465–467
4. Zhong FD, Wang M. Development and quality improvement of hemodialysis in Beijing. *Zhongguo Xueye Jinghua* 2005; 5: 117–118
5. Beijing Hemodialysis Quality Control and Improvement Center. Beijing Hemodialysis Quality Control and Improvement Center annual data report 2007, 1st edn. Beijing, 2009, pp. 1–116
6. Beijing Hemodialysis Quality Control and Improvement Center. Beijing Hemodialysis Quality Control and Improvement Center annual data report 2010. *Zhongguo Xueye Jinghua* 2011; 10s (10s):s1–s23
7. U S Renal Data System. USRDS 2011 Annual Data Report: Atlas of Chronic Kidney Disease and End-Stage Renal Disease in the United States, National Institutes of Health, National Institute of Diabetes and Digestive and Kidney Diseases, Bethesda, MD, 2011
8. Pisoni RL, Arrington CJ, Albert JM *et al.* Facility hemodialysis vascular access use and mortality in countries participating in DOPPS: an instrumental variable analysis. *Am J Kidney Dis* 2009; 53: 475–491
9. Port FK, Pisoni RL, Bommer J *et al.* Improving outcomes for dialysis patients in the international Dialysis Outcomes and Practice Patterns Study. *Clin J Am Soc Nephrol* 2006; 1: 246–255
10. Yao Q, Zhang W, Qian J. Dialysis status in China: a report from the Shanghai Dialysis Registry (2000–2005). *Ethn Dis* 2009; 19 (1 Suppl 1): S1–23–6
11. Goodkin DA, Bragg-Gresham JL, Koenig KG *et al.* Association of comorbid conditions and mortality in hemodialysis patients in Europe, Japan, and the United States: the Dialysis Outcomes and Practice Patterns Study (DOPPS). *J Am Soc Nephrol* 2003; 14: 3270–3277
12. Kucirka LM, Grams ME, Lessler J *et al.* Association of race and age with survival among patients undergoing dialysis. *J Am Med Assoc* 2011; 306: 620–626

Received for publication: 24.1.2012; Accepted in revised form: 24.5.2012

*Nephrol Dial Transplant* (2013) 28: 732–740

doi: 10.1093/ndt/gfs323

Advance Access publication 9 October 2012

## Underutilization of peritoneal dialysis: the role of the nephrologist's referral pattern

Jay Hingwala<sup>1</sup>,  
 Jeff Diamond<sup>2</sup>,  
 Navdeep Tangri<sup>1,3,5</sup>,  
 Joe Bueti<sup>1,3,4</sup>,  
 Claudio Rigatto<sup>1,3,5</sup>,  
 Manish M. Sood<sup>1,3,6</sup>,  
 Mauro Verrelli<sup>1,3,6</sup>  
 and Paul Komenda<sup>1,3,5</sup>

<sup>1</sup>Department of Medicine, Section of Nephrology, University of Manitoba, Winnipeg, Canada,

<sup>2</sup>TR Labs, Infomagnetics Technologies, Winnipeg, Canada,

<sup>3</sup>Manitoba Renal Program, Winnipeg, Canada,

<sup>4</sup>Health Sciences Centre, Winnipeg, Canada,

<sup>5</sup>Seven Oaks General Hospital, Winnipeg, Canada and

<sup>6</sup>St. Boniface General Hospital, Winnipeg, Canada

Correspondence and offprint requests to: Paul Komenda; E-mail: paulkomenda@yahoo.com

Keywords: chronic kidney disease, health economics, peritoneal dialysis, physician bias

## ABSTRACT

**Background.** The incidence of end-stage renal disease is increasing, placing a tremendous burden on health care resources. Peritoneal dialysis (PD) is cheaper than hemodialysis and has many potential advantages and few contraindications as an initial modality selection. This study examined differences in patient PD attempt rates between nephrologists using technique survival and mortality as outcomes.

**Methods.** We performed a retrospective review of the Manitoba Renal Program databases from January 2004 to January 2010. Analysis of 630 patients who commenced dialysis and had demographic data available was performed. A genetic matching algorithm was used to balance potential differences between patient characteristics. Each nephrologist was then compared against their peers to calculate a PD attempt rate. The highest attempt rate group was compared with the lowest.

**Results.** When comparing PD attempt rates between groups, all the results were significant. PD technique survival at >90 days showed no significant differences ( $P = 0.42$ ). Patient mortality at >90 days was also not significant when comparing groups ( $P = 0.14$ ).

**Conclusions.** Our data suggest that when comparing the low- with high-attempt groups, the factors limiting PD utilization do not include on-site availability of PD, case mix, funding, patient location or reimbursement. Aggressive approaches of starting more patients on PD did not lead to lower technique survival or higher mortality rates. If the PD attempt rate was maximized, a significant amount of money and resources could be saved or directed toward helping a larger population without significant harm to patients.

## INTRODUCTION

The global incidence of end-stage renal disease (ESRD) continues to climb. In 1990, just over 400 000 patients required maintenance dialysis. In 2010, over 2 million were on dialysis, placing a tremendous burden on health care resources around the world [1]. Peritoneal dialysis (PD) has been shown to be less costly than facility-based hemodialysis (HD) as an initial renal replacement modality choice in most countries [1–4]. PD has the added benefits of preserving a patients residual renal urine output, translating into better solute and volume clearance, providing similar or better patient quality of life and perhaps mortality in the first 12–24 months of therapy [5–12]. Few contraindications preclude the use of PD in patients [13]. Despite this, large variations of PD penetration patterns exist at international, national and even local levels, reflecting a possible complex interplay of patient, social, economic and political factors [14–22].

The primary intent of this study was to isolate the effect of individual nephrologist propensity for their patients to

attempt PD in a large, universal payer/provider, Canadian renal program. The data will be explored further to determine the effect of these differing practices on PD outcomes in the form of technique failure and mortality.

## MATERIALS AND METHODS

The Manitoba Renal Program (MRP) nephrologists are responsible for all referred chronic kidney disease (CKD) patients in addition to managing the renal replacement therapy (RRT) services in the province of Manitoba, Canada (pop. 1.2 million). In 2010, the MRP cared for about 1200 prevalent dialysis patients, with ~20% of patients receiving PD and 2% of patients on home HD yielding about 936 facility-based HD patients. All the patients in the MRP database (including billing claims data) with entries between 3 January 2004 and 24 June 2010 were considered for inclusion in this study. The study focused on the 630 patients that began either HD or PD during the period, and whose first contact in the program corresponded to a dialysis clinic visit no earlier than March 2005. The purpose of the last constraint was to allow association of patients with a particular nephrologist, who could be identified as a first contact with the renal program and multidisciplinary CKD clinic participation prior to dialysis. If a patient was started on HD and then switched to PD, the first contact nephrologist would be ‘credited’ with the PD attempt as we assumed that the majority of modality education would have occurred in the clinic setting. Patients who were never followed in the clinic and began dialysis acutely were excluded from our analysis. This study received appropriate local research ethics board approval from the University of Manitoba.

The primary outcome of interest was whether a patient ever attempted PD or not. A PD attempt was defined as the presence of at least one instance of billing for PD, corresponding to an entry for that patient into the MRP PD database. The explanatory variables considered in the analysis included demographic variables (e.g. age, sex, race, rural location of residence), primary cause of ESRD (eg. acute tubular necrosis, cancer, congenital renal disease, diabetes mellitus type 1 or 2, failed transplant, glomerulonephritis, hypertension and polycystic kidney disease) and comorbid risk factors, including cerebrovascular disease, peripheral vascular disease, angina, chronic obstructive pulmonary disease, prior myocardial infarction, prior coronary artery bypass graft or percutaneous coronary intervention, smoking, diabetes, hypertension, congestive heart failure and malignancy. The MRP database that was interrogated for demographic variables, cause of ESRD and comorbid risk factors has been described elsewhere in terms of validation steps in place to ensure data quality and integrity [23]. In brief, all comorbidities and modality commencement and discontinuations were adjudicated at a formal interdisciplinary rounds session conducted on a weekly basis. Finally, health-system-related

factors were considered as explanatory variables such as availability of PD at initial site of referral and who the primary nephrologist was for pre-dialysis CKD clinic care.

Each explanatory variable of interest was first considered separately for association with the PD attempt variable by univariate analysis. All the variables considered were categorical and analyzed using Fisher's test. If a Fisher test showed a variable to be significantly ( $P$ -value  $< 0.05$ ) associated with PD attempt, it was included in the model going forward. If the Fisher test showed that the variable was not significant, a genetic matching algorithm was applied to balance all other covariates, and the variable was then included in the model if the  $P$ -value ( $< 0.05$ ) for a subsequent paired test showed significant association between the variable of interest and PD attempt [24]. This process allowed the inclusion of variables of interest whose association with PD attempt might be masked by interaction with other covariates. A similar process was applied to determine variables associated with technique survival and mortality at 90 days, where the Fisher and  $t$ -tests are replaced by log-rank tests for comparing survival curves with censored data. This process is depicted in Figure 1.

To assess the impact of nephrologist practice patterns on PD attempt rate, the odds ratio for attempting PD was calculated for each physician relative to all their peers. This allowed nephrologists to be divided into low- and high-attempt groups, using an odds ratio of 1 as a cutoff. PD attempt rates, technique survival and mortality at 90 days were then compared between the high-attempt and low-attempt groups. Each of the aforementioned variables included in the model in the tests of association with PD attempt was tested for balance across the high- and low-attempt group with Fisher tests. Any variable found to differ significantly ( $P$ -value  $< 0.05$ ) between the two groups was balanced by the genetic matching algorithm [24].

This method constructs a list of matched pairs of patients, one from the control (low attempt) and one from the treatment (high attempt) group to make a virtual cohort. This virtual cohort is constructed such that there is no significant ( $P$ -value  $< 0.05$ ) difference between the control and treatment

group with respect to univariate Fisher or  $t$ -test comparisons for any of the covariates included in the model (Figure 2). The genetic matching algorithm is a generalization of common matching methods such as those based on the Mahalanobis distance or a propensity score estimated by logistic regression. These methods have appealing theoretical properties when the distributions of covariates have certain properties, the true propensity score is known and the sample size is large; however, these constraints are difficult to satisfy in practice and, in their absence, matching will in general increase the bias of some of the covariates [25]. These methods, therefore, have the potential to increase the influence of some potential confounders and frequency do so in practice [26–28]. Genetic matching is a non-parametric method used by a variety of researchers in various fields [29–35], which employs a genetic algorithm to optimize the balance between covariates as much as possible and does not depend on the knowledge or estimation of the propensity score. In our study, genetic matching was employed to define two similar groups with balanced confounders and the technique survival and mortality at 90 days were compared between these two virtual cohorts.

## RESULTS

Six hundred and thirty patients were included in the analysis. The baseline characteristics of these 630 patients are included in Table 1. The median time a patient spent in clinic before starting dialysis was 30 months. A plot of odds ratios for nephrologist PD 'attempt rate' with confidence intervals is depicted in Figure 3. Ten of the 19 nephrologists yielded an odds ratio of  $< 1.0$ , with the remainder having an odds ratio for PD attempt  $> 1.0$  relative to the set of their peers. For the purposes of comparison those nephrologists more likely to have patients attempt PD relative to their peers with those less likely, we separated them into two categories. Figure 4 depicts the relative influence of adding more nephrologists to the high and low PD attempt groups, affects the size of the

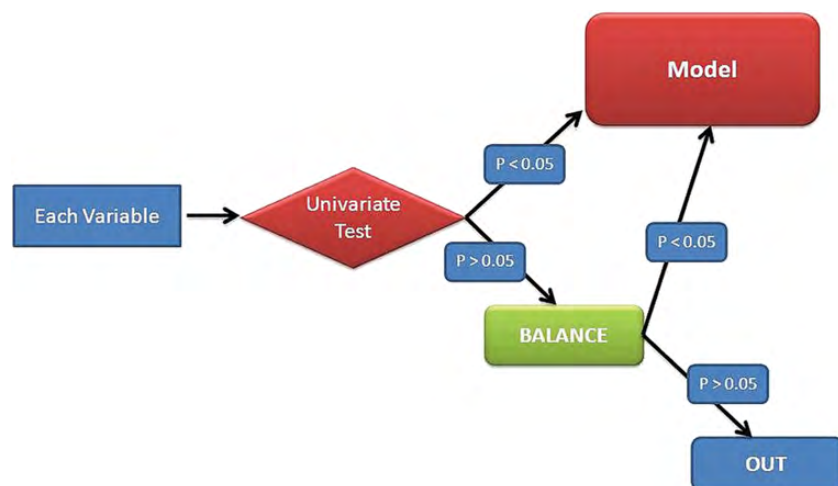

FIGURE 1: Variable analysis.

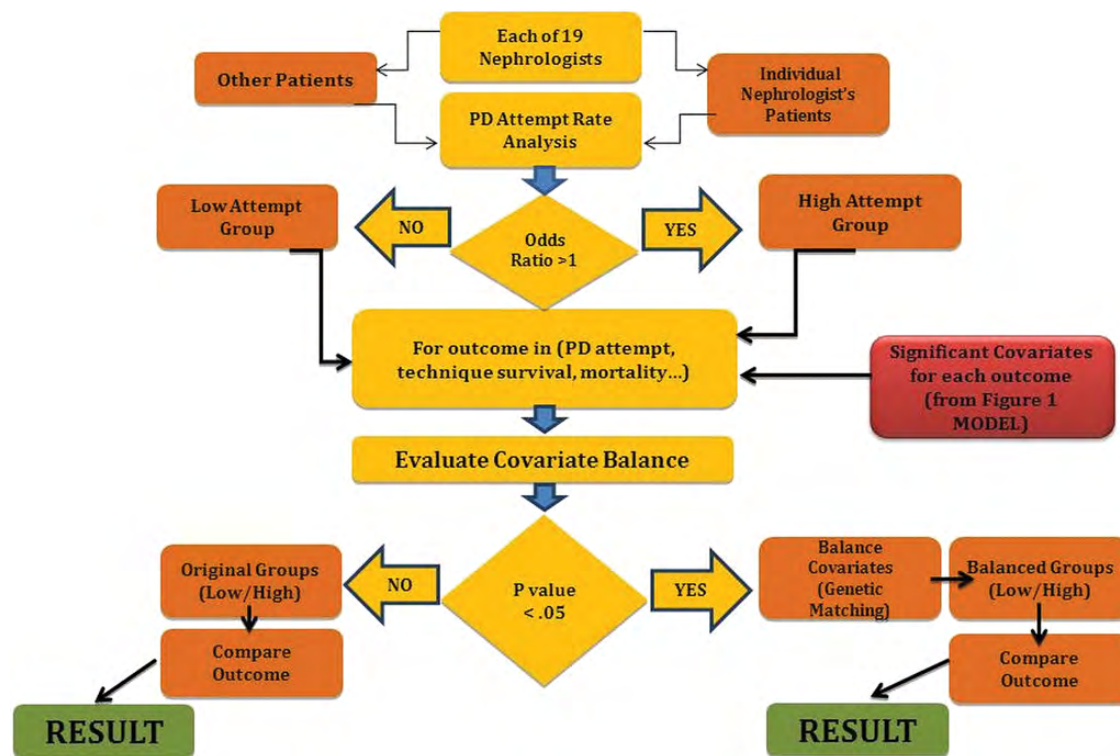

FIGURE 2: Nephrologist groupings.

effect between comparing groups and the confidence of the estimate. All nephrologists were included in the final model comparing high- and low- PD attempt groups.

When comparing survival outcomes between the high-attempt group (with 9 nephrologists) and the low-attempt group (with 10 nephrologists), the mortality at >90 days showed no significant difference (Figure 5,  $P = 0.418$ ). The technique survival also found no significant difference between groups ( $P = 0.142$ ) when compared. The comparisons of technique survival and mortality were performed on virtual cohorts, which were balanced so that there were no significant ( $P$ -value  $< 0.05$ ) differences between groups in the variables determined in the manner described earlier to be associated with those two outcomes of interest.

## DISCUSSION

This study demonstrates that there are significant differences between nephrologists as to whether or not their patients ever attempt PD out of the CKD clinic. We have shown that despite this variable attempt rate, patients of nephrologists with a more aggressive approach to PD do not suffer from an earlier technique survival or increased mortality. Therefore, a more aggressive PD approach does not appear to disadvantage patients as measured by these two important PD outcomes. To control for potential patient demographic and comorbidity differences and their effect on nephrologists' PD attempt rate, in addition to factors such as availability of on-site PD, we used a genetic matching algorithm with matched pairs to yield significant differences between groups. The

matched higher attempt group, or those who had more aggressive rates of PD compared with their peers, did not have a significant difference in either technique survival or mortality for patients lasting 90 days on treatment. In a provincial program with universally homogenous funding models, reimbursement schemes and clinic resources, this begs the question: 'Is individual nephrologist practice style a significant modifiable factor in increasing patient uptake of PD?'

The strengths of this study include the comprehensiveness of patient inclusion and follow-up in a defined geographic region, and the unique matching algorithm employed to isolate the effect of nephrologist attempt rate on PD. Manitoba, Canada, has a single-payer universal health care system, for which the MRP provides and tracks all renal services provided including pre-dialysis CKD care. In the MRP, once a patient begins PD, they are considered a patient of the 'PD service' which is rotated on by different PD nephrologists. Our largest site in Manitoba does not have PD services, meaning that the nephrologists at that site do not have extensive experience with PD, and yet site of referral was not a statistically significant predictor of whether or not a patient ever attempts PD. All nephrologists practice at one of four sites in the province, and there is no specific competition for referrals between or within sites. All CKD patients cared for by nephrologists have the same access to multidisciplinary teams, who typically work in more than one nephrologist clinic and are charged with extensive education of patients on dialysis modality choice. Despite this organizational structure designed to minimize biases in patient population followed by a nephrologist, and the standardized teaching on modalities patients receive, we employed very sophisticated

| Table 1. Patient characteristics ( <i>n</i> = 630) |                    |
|----------------------------------------------------|--------------------|
| Primary ESRD diagnosis                             | Proportion         |
| Renovascular/unknown                               | 37.4%              |
| Type 2 diabetes                                    | 28.6%              |
| Glomerulonephritis                                 | 13.9%              |
| Acute tubular necrosis                             | 7.0%               |
| Hypertension                                       | 6.6%               |
| Type 1 diabetes                                    | 3.2%               |
| Polycystic kidney disease                          | 2.1%               |
| Congenital                                         | 0.06%              |
| Malignancy                                         | 0.05%              |
| Failed transplant                                  | 0.01%              |
| Comorbidities                                      | Proportion         |
| Hypertension (on medication)                       | 84.8%              |
| Type 2 diabetes                                    | 65.4%              |
| Congestive heart failure                           | 18.1%              |
| Cardiovascular disease                             | 15.5%              |
| Peripheral arterial disease                        | 14.5%              |
| Smoker                                             | 14.1%              |
| Ischemic heart disease                             | 14.6%              |
| Prior malignancy                                   | 9.1%               |
| Coronary intervention (bypass, percutaneous)       | 8.9%               |
| Angina                                             | 8.1%               |
| Chronic obstructive pulmonary disease              | 6.3%               |
| Type 1 diabetes                                    | 2.9%               |
| Race                                               | Proportion         |
| Caucasian                                          | 53.2%              |
| First nations                                      | 28.7%              |
| Other                                              | 11.9%              |
| Asian                                              | 6.2%               |
| Sex                                                | Proportion         |
| Male                                               | 55.3%              |
| Female                                             | 43.8%              |
| Unknown                                            | 0.09%              |
| Continuous variables                               | Mean $\pm$ SD      |
| Age                                                | 56.9 $\pm$ 19.05   |
| Body mass index                                    | 28.39 $\pm$ 7.12   |
| Km to nearest nursing station                      | 195.54 $\pm$ 72.20 |
| Km to nearest HD center                            | 42.13 $\pm$ 35.24  |
| Km to nearest health center                        | 34.37 $\pm$ 71.88  |
| Km to nearest hospital                             | 24.84 $\pm$ 44.56  |

### Odds Ratios for PD Attempt Rate by Nephrologist Relative to Set of Peers

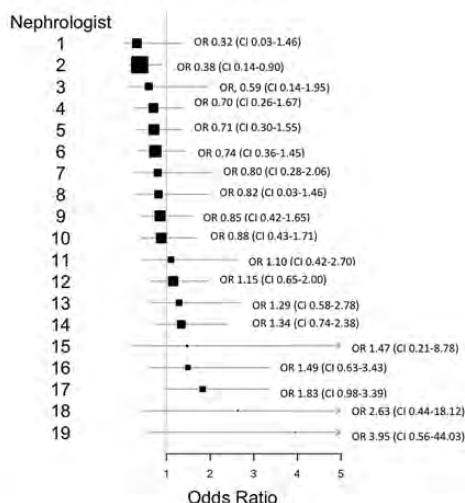

**FIGURE 3:** Odds ratio of PD attempt rates by individual nephrologists.

matching algorithms to isolate the effect that the attending nephrologist had on a patient's propensity to attempt PD. Our results indicate a strong signal in this area, which appears valid and confirms our hypothesis.

The cost of RRT poses a large financial and resource demand on health care systems throughout the world [1–4]. With growing numbers of ESRD patients, there is an urgent need to research and explore more cost-effective measures for RRT at a population level while optimizing patient quality of life, health outcomes and freedom of choice [4].

With few contraindications to PD [1, 13], this modality can fortunately be used for effective treatment in the majority of dialysis patients. By taking into account medical issues, the patients' social factors, cost effectiveness and overall benefit to the patients, an ideal modality option can be then determined [36]. With the consideration of all the potential advantages of PD, our project explores the effect of higher PD rates by an individual nephrologist, particularly, whether more aggressive rates of PD had a higher mortality or technique failures. Our study did not find any significant differences between the two groups for mortality at >90 days ( $P = 0.418$ ) or with technique failure at >90 days ( $P = 0.142$ ).

A possible explanation for our findings may be associated with the advantages that PD is purported to hold over conventional in-center HD. These benefits may balance out the potential downfalls of a more aggressive PD approach. The maintenance of residual renal function is hypothesized to contribute to the initial survival benefit for PD over conventional HD through augmented middle molecule clearance, improved nutrition through more liberal diet and fluid intake, increased endocrine function with higher hemoglobin levels, lower systolic blood pressures and fewer arrhythmias [1, 37, 38]. There appear to be no demonstrable differences in infectious complications between PD and HD [39, 40]. Episodes of potentially more severe bacteremia and fungemia

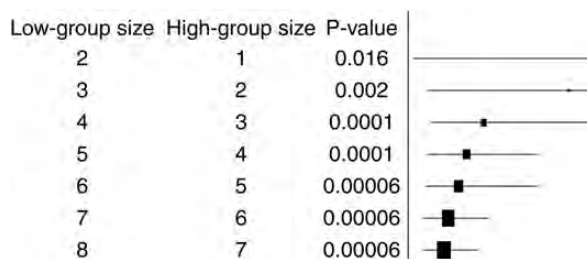

**FIGURE 4:** Odds ratio of PD attempt rates by groups. The first line depicts the two nephrologists least likely to have patients attempt PD (low group) compared with the one nephrologist most likely. As more nephrologists are added to each group, the odds ratio becomes less pronounced, but confidence intervals become narrower.

were found mainly in their HD population, whereas peritonitis was the main complication related to PD patients. The overall infection-related hospitalization rates were lower in PD patients [38]. Li and Chow [13] recently published a study stating that centers in Canada with >500 PD patients had a 29% relative risk reduction in mortality and lower technique failures compared with centers with <99 PD patients. Nephrologists at larger centers, similar to ours, may be better able to manage PD complications and may make more appropriate selections of patients for PD.

In addition to the aforementioned benefits, several studies have demonstrated an improved quality of life with PD [5, 6]. PD confers considerable cost savings compared with HD of at least \$20 000 USD per patient per year in Canada, the USA and Europe [1–5, 41–43]. The lower costs stem mainly from PD being a home-based therapy, requiring little overhead and nursing costs, as well as less medication, particularly erythropoietin therapy requirements [3, 21, 40].

The survival comparison outcomes from previous studies are controversial [7–12] with the majority of consensus agreeing that there is little difference in PD and HD mortality rates. The US Renal Data Systems 2008 annual report found no significant mortality difference at 60 months, and PD held a slight survival advantage in some population subsets. Canadian data found an initial 2-year survival benefit for PD [8]. Observational survival data comparing HD and PD are limited by the confounding of potential selection bias. We found only three other studies that have used propensity matching to compare survival between the two modalities [7–9]. The first study did not show any significant mortality difference at 90 days, while the second study used mortality after 90 days as an endpoint. The most recent study, published by Weinhandl *et al.* [9], showed a slight mortality benefit favoring PD, with a hazard ratio of 0.92 at 90 days ( $P = 0.04$ ), with that benefit lost at 48 months. Hemmelgarn *et al.* [10] found that East Indian and Indo-Asian patients were 50% more likely than Caucasians to start PD.

Other studies have demonstrated that there are discordant opinions between nephrologists on whether or not PD is an optimal modality for most patients [44, 45]. Bouvier *et al.* were able to demonstrate a link between regional variations in PD prevalence to nephrologist opinion on the optimal mix

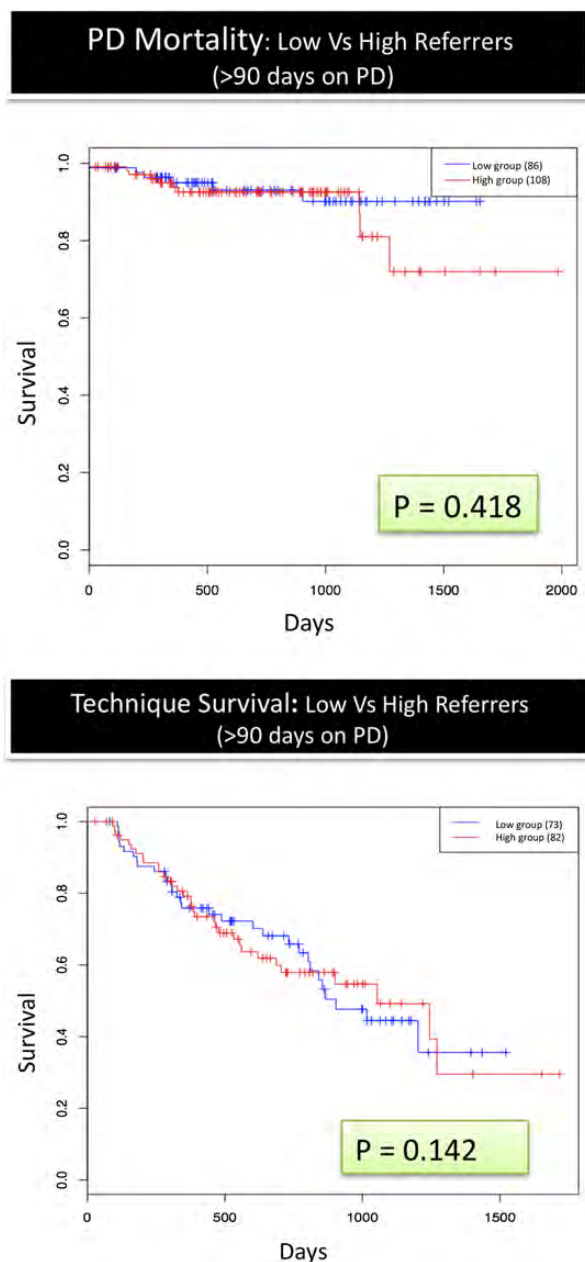

**FIGURE 5:** Mortality and technique survival comparisons between groups.

of HD: PD patients in the same region. Our study is the first, to our knowledge, that attempts to isolate the primary nephrologist for CKD care as a covariate in PD attempt rate. Variable uptake rates in other jurisdictions of PD would suggest that our results are likely generalizable to programs elsewhere. Over the course of this study, Manitoba had a PD prevalence ranging from 18 to 20%.

Our study has limitations. As it was a retrospective database review, we relied on the information entered into the database to be accurate. Further, as patients were not randomized and dialysis modalities were not randomly selected, causality cannot be confirmed. It is unlikely that a randomized trial will ever be conducted in this area because of the high value based on patient choice and motivation. Although

extensive matching algorithms were applied, our data were not able to account for socio-economic factors as a potential confounder. As mentioned, however, consults are for the most part distributed among nephrologists randomly within the three practicing centers located in Winnipeg. There were no univariate differences in patient characteristics by center.

In conclusion, PD as an initial modality choice has been shown to maintain or improve patient health-related quality of life, has similar mortality outcomes and is typically much less costly compared with HD. As per convention in health economics, when offering health technologies and interventions without significant differences in mortality or quality of life, the least expensive option should be promoted by health care payers and providers. While patient-related factors preventing the ability to perform PD are often non-modifiable (e.g. blindness, severe cognitive impairment), the majority of patients are still eligible to attempt PD as a renal replacement modality. Integrated renal care programs should therefore be organized to minimize the potential bias of clinicians in selecting modality choice ‘including standardized teaching algorithms and the assignment of patients to dedicated late-stage CKD interdisciplinary programs, not simply individual nephrologist practices’. We do, however, recognize that despite a PD first promotion strategy, patients may opt for facility-based HD and that the ability to choose still may be honored. Our study in a universally funded health care system is one of the first to show that clinician bias may be a significant modifiable factor in augmenting PD rates. We would suggest that this approach be taken in other health care regions to aid in appropriate policy recommendations specific to local practices.

#### CONFLICT OF INTEREST STATEMENT

The results presented in this paper have not been published previously in whole or part, except in abstract format.

(See related article by Woodrow. What are the factors underlying the variation in the use of peritoneal dialysis? *Nephrol Dial Transplant* 2013; 28: 501–504.)

#### REFERENCES

1. Neil N, Walker DR, Sesso R *et al*. Gaining efficiencies: resources and demand for dialysis around the globe. *Value Health* 2009; 12: 73–79.
2. De Vecchi AF, Dratwa M, Wiedemann ME. Healthcare systems and end-stage renal disease (ESRD) therapies—an international review: costs and reimbursement/funding of ESRD therapies. *Nephrol Dial Transplant* 1999; 14 (Suppl 6): 31–41.
3. Lee H, Manns B, Taub K *et al*. Cost analysis of ongoing care of patients with end-stage renal disease: the impact of dialysis modality and dialysis access. *Am J Kidney Dis* 2002; 40: 611–622.
4. Sennfalt K, Magnusson M, Carlsson P. Comparison of hemodialysis and peritoneal dialysis—a cost-utility analysis. *Perit Dial Int* 2002; 22: 39–47.

5. Ginieri-Coccosis M, Theofilou P, Synodinou C *et al.* Quality of life, mental health and health beliefs in haemodialysis and peritoneal dialysis patients: investigating differences in early and later years of current treatment. *BMC Nephrol* 2008; 9: 14.
6. Juergensen E, Wuerth D, Finkelstein SH *et al.* Hemodialysis and peritoneal dialysis: patients' assessment of their satisfaction with therapy and the impact of the therapy on their lives. *Clin J Am Soc Nephrol* 2006; 1: 1191–1196.
7. Schaubel DE, Morrison HI, Fenton SS. Comparing mortality rates on CAPD/CCPD and hemodialysis. The Canadian experience: fact or fiction? *Perit Dial Int* 1998; 18: 478–484.
8. Vonesh EF, Snyder JJ, Foley RN *et al.* Mortality studies comparing peritoneal dialysis and hemodialysis: what do they tell us? *Kidney Int Suppl* 2006; 103: S3–S11.
9. Weinhandl ED, Foley RN, Gilbertson DT *et al.* Propensity-matched mortality comparison of incident hemodialysis and peritoneal dialysis patients. *J Am Soc Nephrol* 2010; 21: 499–506.
10. Hemmelgarn BR, Chou S, Wiebe N *et al.* Differences in use of peritoneal dialysis and survival among East Asian, Indo Asian, and white ESRD patients in Canada. *Am J Kidney Dis* 2006; 48: 964–971.
11. Fenton SS, Schaubel DE, Desmeules M *et al.* Hemodialysis versus peritoneal dialysis: a comparison of adjusted mortality rates. *Am J Kidney Dis* 1997; 30: 334–342.
12. McDonald SP, Russ GR, Kerr PG *et al.* ESRD in Australia and New Zealand at the end of the millennium: a report from the ANZDATA registry. *Am J Kidney Dis* 2002; 40: 1122–1131.
13. Li PK, Chow KM. Peritoneal dialysis patient selection: characteristics for success. *Adv Chronic Kidney Dis* 2009; 16: 160–168.
14. U S Renal Data System. USRDS 2010 Annual Data Report: Atlas of Chronic Kidney Disease and End-Stage Renal Disease in the United States, National Institutes of Health, National Institute of Diabetes and Digestive and Kidney Diseases. Bethesda, MD, 2010; 391. <http://www.usrds.org/adr.aspx>
15. Kidney Care Statistics. Historical Data: 2001–2009. BC Provincial Renal Agency, 2009.
16. Blake PG. Integrated end-stage renal disease care: the role of peritoneal dialysis. *Nephrol Dial Transplant* 2001; 16 (Suppl 5): 61–66.
17. Jung B, Blake PG, Mehta RL *et al.* Attitudes of Canadian nephrologists toward dialysis modality selection. *Perit Dial Int* 1999; 19: 263–268.
18. Moeller S, Gioberge S, Brown G. ESRD patients in 2001: global overview of patients, treatment modalities and development trends. *Nephrol Dial Transplant* 2002; 17: 2071–2076.
19. Just PM, de Charro FT, Tschosik EA *et al.* Reimbursement and economic factors influencing dialysis modality choice around the world. *Nephrol Dial Transplant* 2008; 23: 2365–2373.
20. Ledebro I, Ronco C. The best dialysis therapy? Results from an international survey among nephrology professionals. *NDT Plus* 2008; 1: 403–408.
21. Komenda P, Sood MM. The economics of home dialysis: acting for the individual while planning responsibly for the population. *Adv Chronic Kidney Dis* 2009; 16: 198–204.
22. Mendelssohn DC, Langlois N, Blake PG. Peritoneal dialysis in Ontario: a natural experiment in physician reimbursement methodology. *Perit Dial Int* 2004; 24: 531–537.
23. Sood MM, Komenda P, Sood AR *et al.* Adverse outcomes among aboriginal patients receiving peritoneal dialysis. *Can Med Assoc J* 2010; 182: 1433–1439.
24. Sekhon J. Multivariate and propensity score matching software with automated balance optimization: the matching Package for R. *J Statist Softw* 2011; 42.
25. Morgan SL, Harding DJ. Matching estimators of causal effects: prospects and pitfalls in theory and practice. *Sociological Methods Res* 2006; 35: 3–60.
26. Rubin DB, Thomas N. Affinely invariant matching methods with ellipsoidal distributions. *Ann Statist* 1992; 20: 1079–1093.
27. Rubin DB. Multivariate matching methods that are equal percent bias reducing, I: some examples. *Biometrics* 1976a; 32: 109–120.
28. Rubin DB. Multivariate matching methods that are equal percent bias reducing, II: maximums on bias reduction for fixed sample sizes. *Biometrics* 1976b; 32: 121–132.
29. Andam KS, Ferraro PJ, Pfaff A *et al.* Measuring the effectiveness of protected area networks in reducing deforestation. *Proc Natl Acad Sci* 2008; 105: 16089–16094. URL <http://www.pnas.org/content/105/42/16089.abstract>.
30. Eggers A, Hainmueller J. The value of political power: estimating returns to office in post-war British politics. *Am Polit Sci Rev* 2009; 103: 513–533.
31. Gilligan MJ, Sergenti EJ. Do UN interventions cause peace? Using matching to improve causal inference. *Q J Polit Sci* 2008; 3: 89–122.
32. Gordon SC. Assessing partisan bias in federal public corruption prosecutions. *Am Polit Sci Rev* 2009; 103: 534–554. URL <http://journals.cambridge.org/action/displayAbstract?fromPage=online&aid=6648228&fulltextType=RA&fileId=S0003055409990207>.
33. Heinrich CJ. Demand and supply-side determinants of conditional cash transfer program effectiveness. *World Dev* 2007; 35: 121–143.
34. Lenz GS, Ladd JM. Exploiting a rare communication shift to document the persuasive power of the news media. *Am J Polit Sci* 2009; 53: 394–410.
35. Raessler S, Rubin D. Complications when using nonrandomized job training data to draw causal inferences. In: Proceedings of the International Statistical Institute. URL: <http://www.websm.org/upload/1132827726ISI.Susie.doc>. 2005.
36. van den Wall Bake AW, Kooman JP, Lange JM *et al.* Adequacy of peritoneal dialysis and the importance of preserving residual renal function. *Nephrol Dial Transplant* 2006; 21 (Suppl 2): ii34–ii37.
37. Williams VR, Quinn R, Callery S *et al.* The impact of treatment modality on infection-related hospitalization rates in peritoneal dialysis and hemodialysis patients. *Perit Dial Int* 2011; 31: 440–449.
38. Aslam N, Bernardini J, Fried L *et al.* Comparison of infectious complications between incident hemodialysis and peritoneal dialysis patients. *Clin J Am Soc Nephrol* 2006; 1: 1226–1233.
39. Dalrymple LS, Go AS. Epidemiology of acute infections among patients with chronic kidney disease. *Clin J Am Soc Nephrol* 2008; 3: 1487–1493.



40. Berger A, Edelsberg J, Inglese GW *et al.* Cost comparison of peritoneal dialysis versus hemodialysis in end-stage renal disease. *Am J Manag Care* 2009; 15: 509–518.
41. Blake PG. The complex economics of modality selection. *Perit Dial Int* 2004; 24: 509–511.
42. Golper T. Patient education: can it maximize the success of therapy? *Nephrol Dial Transplant* 2001; 16 (Suppl 7): 20–24.
43. Klarenbach S, Manns B. Economic evaluation of dialysis therapies. *Semin Nephrol* 2009; 29: 524–532.
44. Bouvier N, Durand PY, Testa A *et al.* Regional discrepancies in peritoneal dialysis utilization in France: the role of the nephrologist's opinion about peritoneal dialysis. *Nephrol Dial Transplant* 2009; 24: 1293–1297.
45. Mendelssohn DC, Mullaney SR, Jung B *et al.* What do American nephrologists think about dialysis modality selection? *Am J Kidney Dis* 2001; 37: 22–29.
46. Nissenson AR, Prichard SS, Cheng IK *et al.* ESRD modality selection into the 21st century: the importance of non medical factors. *ASAIO J* 1997; 43: 143–150.
47. Baboolal K, McEwan P, Sondhi S *et al.* The cost of renal dialysis in a UK setting—a multicentre study. *Nephrol Dial Transplant* 2008; 23: 1982–1989..

*Received for publication: 29.1.2012; Accepted in revised form: 6.4.2012*
